# Supplementary material for: Trichoderma pubescens Elicit Induced Systemic Resistance in Tomato Challenged by Rhizoctonia solani
Source: MDPI journal article supplement (doi:10.3390/jof9020167), 2023-01-27
Supplement: s1 [file s1]

**Table S1.** Response of tomato plants to pathogenicity of *Rhizoctonia solani* isolates recorded as disease index (DI%).

| Isolates | Disease index $\pm$ SD* |
|----------|-------------------------|
| R1       | 41.49 $\pm$ 2.26 d      |
| R2       | 68.16 $\pm$ 3.42 b      |
| R3       | 74.80 $\pm$ 3.73 b      |
| R4       | 83.68 $\pm$ 4.36 a      |
| R5       | 54.26 $\pm$ 1.49 c      |

\*SD means standard deviation. Different letters alongside data values in each column mean the values differed significantly at  $p$ -value  $\leq 0.05$ .
